# Supplementary material
Source: Springer Nature journal article supplement (https://www.springermedizin.de/resource/supplementary/12958_2007_386_MOESM6_ESM.pdf/9567770)

15

20

40

MMP-2

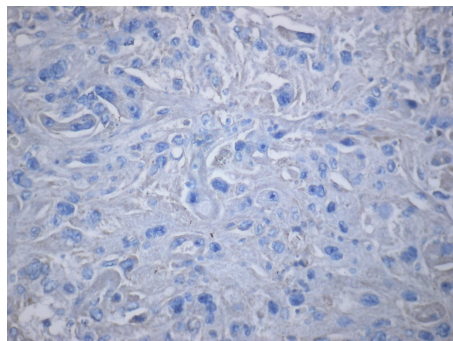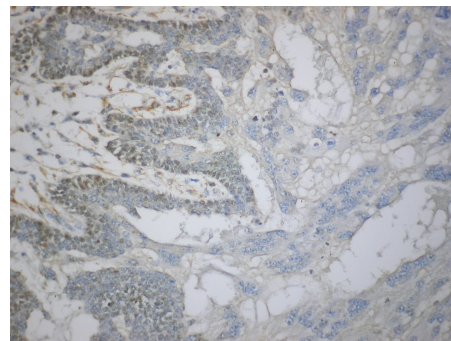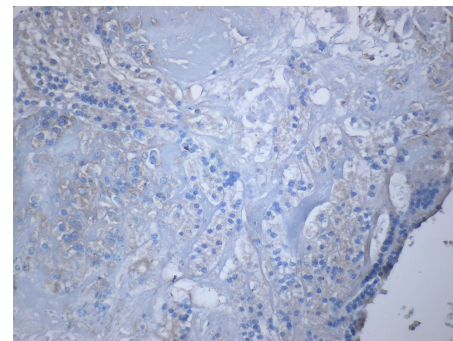

MMP-9

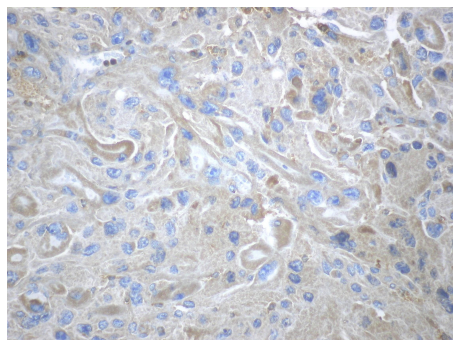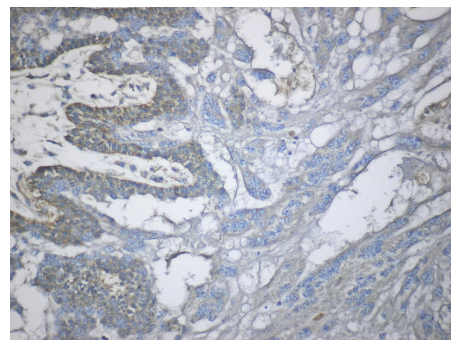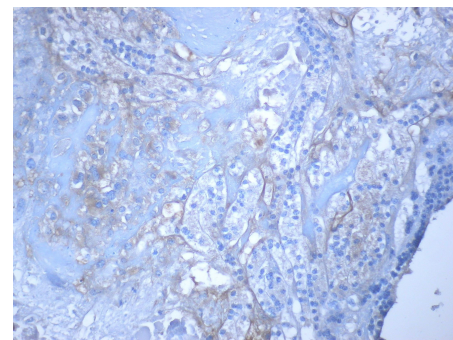

K1

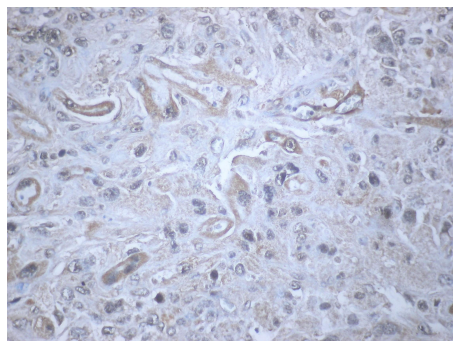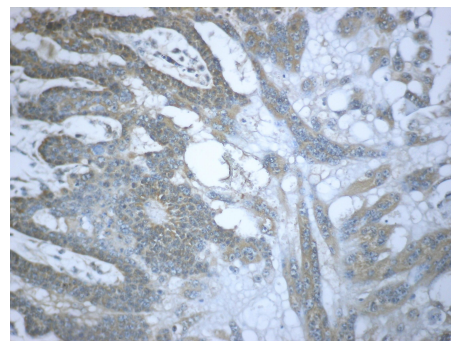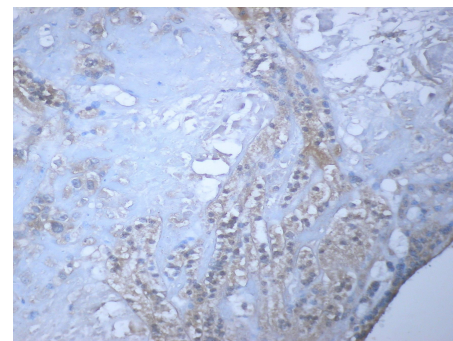

CK

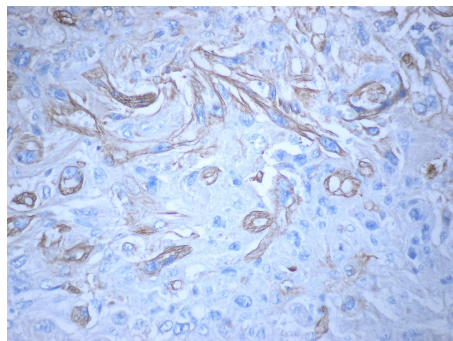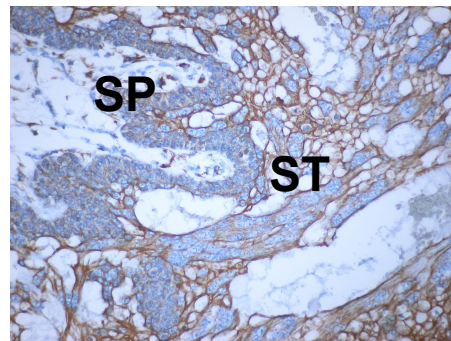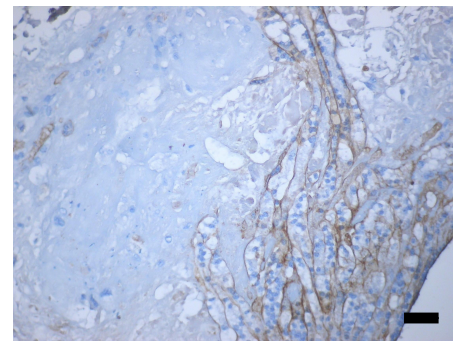

Supplement: MOESM6 [file 9567770]
